# Supplementary material for: A prospective, multicentre, single-arm clinical trial of bevacizumab for patients with surgically untreatable, symptomatic brain radiation necrosis
Source: PubMed Central journal article supplement — Neurooncol Pract. 2016 Jan 7;3(4):272–80. doi: 10.1093/nop/npv064 (PMC5099992; doi:10.1093/nop/npv064), 2016-01-07
Supplement: supp_npv064_npv064supp.pdf [file supp_npv064_npv064supp.pdf]

**A prospective multicenter single-arm clinical trial of bevacizumab for patients with surgically untreatable symptomatic brain radiation necrosis,” by Furuse et al.**

**Supplementary Materials**

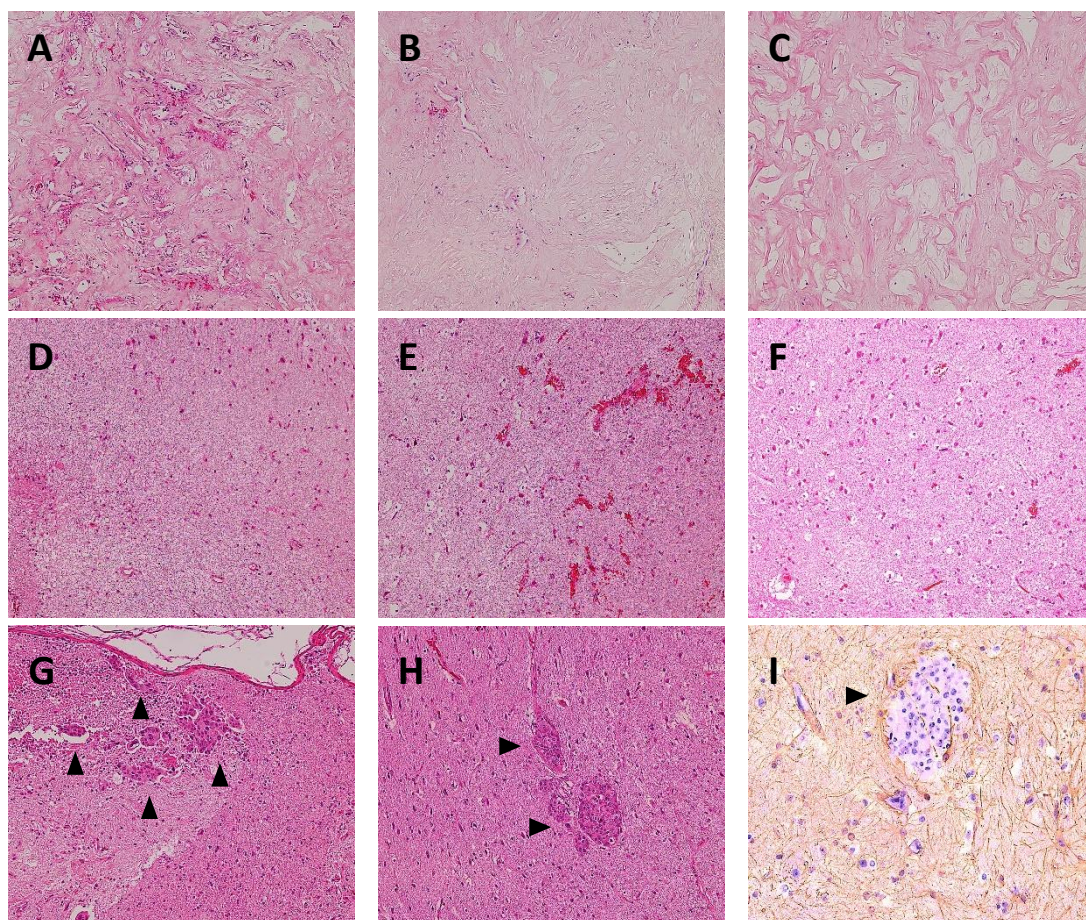

**Supplementary Fig. 1.** A representative sample of BRN removed by surgery. **A–H:** Hematoxylin and eosin (H.E.) findings for eight different sites in the same BRN specimen from a metastatic brain tumor ( $\times 100$  magnification). Apparent tissue necrosis in A–C and damaged brain parenchyma in D–H are shown. The islet-like tumor clusters

can be seen only in G and H. **I:** Immunohistochemical staining for GFAP with hematoxylin counterstain ( $\times 200$ ). A tumor islet consisting of viable tumor cells (GFAP-negative) is seen against the GFAP-positive background. If a biopsy is performed for this patient, the diagnosis may be “pure BRN” when tissue from areas A–F is sampled. However, the diagnosis can be changed to “necrotic tissue with viable cancer cells” when the area shown in G or H is sampled. As shown in this figure, it is not uncommon that residual tumor cells survive in and around the necrotic lesion in surgical specimens diagnosed as BRN. This is not surprising because not a few patients with a malignant brain tumor, especially those with a malignant glioma, eventually develop tumor recurrence after radiation therapy. In short, pure BRN is rather rare, and surviving tumor cells can be found by searching the lesion out.

In such cases, the predominant cause of perilesional edema, the relapsed tumor or the radiation necrosis must be thoroughly investigated. However, identification of the cause is not easy when only small biopsied specimens are available because, in BRN, islet-shaped residual tumor cells are strewn around the necrotic core, and not at the circumference (A–H). This means that the diagnosis for a biopsied specimen depends largely on the site from where it was removed. Moreover, in this case, marked interstitial edema could not be found just around the residual tumor islets. We presume

that in this case the cerebral edema was caused by BRN and not by tumor residue or tumor proliferation. We therefore used amino-acid PET to diagnose BRN with a specified cut-off value instead of a surgical biopsy in the present study.

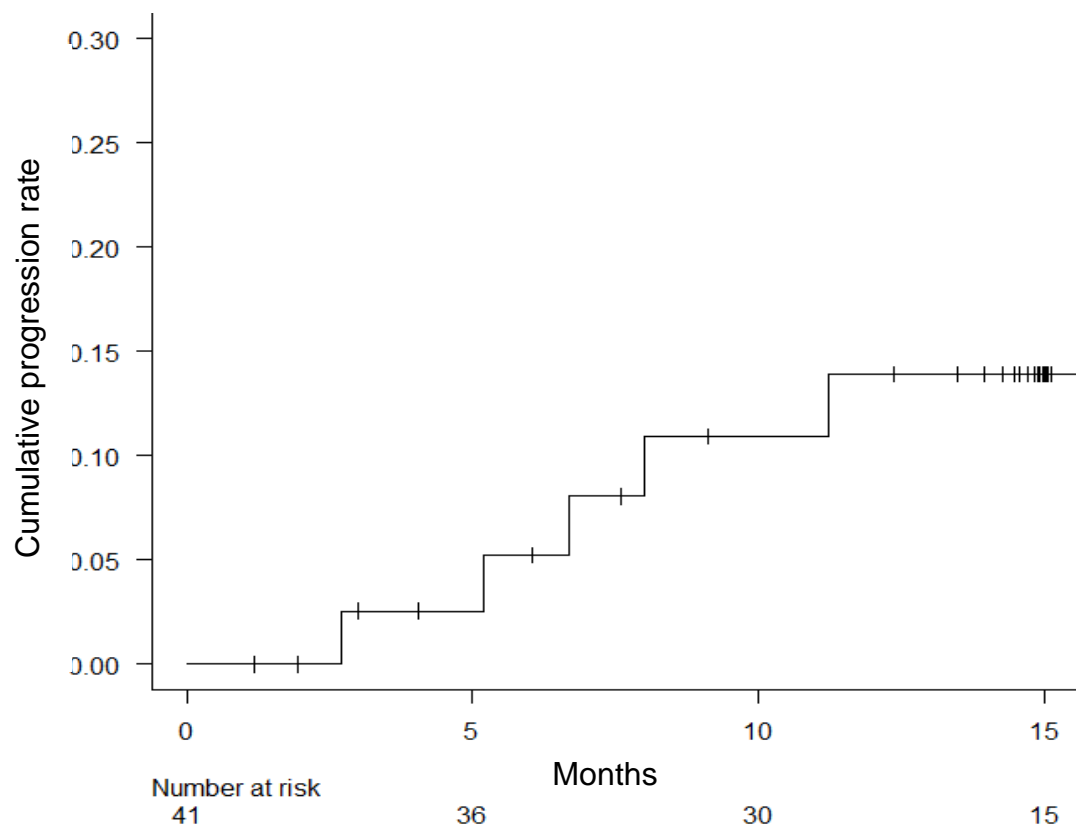

**Supplementary Fig. 2.** Kaplan-Meier analysis of the cumulative tumor-recurrence rate.

## **Enrollment inclusion and exclusion criteria details**

### *Inclusion criteria:*

Hematologic, hepatic, and renal function were adequate as follows: absolute neutrophil count  $\geq 1500 \text{ mm}^3$ ; platelet count  $\geq 100000 \text{ mm}^3$ ; hemoglobin  $\geq 9.5 \text{ g/dL}$ ; serum glutamic oxaloacetic transaminase (GOT) and serum glutamic pyruvic transaminase (GPT)  $< 2.5$ -fold; total bilirubin  $\leq 2.0 \text{ mg/dL}$ ; serum creatinine  $\leq 1.2 \text{ mg/dL}$ ; urine protein  $\leq 1+$ ; prothrombin time-international normalized ratio (PT-INR)  $\leq 1.5$ -fold.

The PT-INR was stable at a range of 1.5–2.5 when anticoagulant was used.

Life expectancy was greater than 3 months.

Able to provide written informed consent (patient or legally authorized representative).

In cases of radiation necrosis with a metastatic brain tumor, no active lesion was detected by PET or other radiographic examinations, and the values of tumor markers were within normal limits (if they were examined).

*Exclusion criteria:*

- The patient was able to undergo surgery to remove necrotic tissue of the brain.
- The patient's intracranial tumor was active and recurrent (i.e., the L/N ratio on F-BPA-PET was  $>2.5$ , or the L/N ratio on C-MET-PET was  $>1.8$ ).
- The patient required the intravenous administration of antibiotics, antiviral drugs, or antifungal drugs for infection.
- The patient was febrile ( $< 38^{\circ}\text{C}$  body temperature or equal).
- The patient had:
  - a severe comorbidity such as heart disease, pulmonary fibrosis, interstitial pneumonia, hemorrhagic diathesis, or uncontrollable hypertension or diabetes
  - comorbid or history of unstable angina or myocardial infarction within the prior 6 months
  - uncontrollable peptic ulcer
  - uncontrollable hypertension
  - unhealed advanced wound or fracture
  - comorbid or history of gastrointestinal perforation and fistula, or abdominal abscess within 6 months

- comorbid or history of hemoptysis and pulmonary hemorrhage > Grade 1
- comorbid or history of vascular diseases (venous and arterial thrombosis and embolism, aortic aneurysms) that required intervention within the prior 6 months
- congestive heart failure > NYHA class I
- a scheduled operation during this study or had been operated within the 4 weeks prior to registration
- hemorrhage (intracranial hemorrhage, gastrointestinal hemorrhage, urinary hemorrhage, hemoptysis)
- PT-INR > 2.5 or unstable during anticoagulant use
- history of severe hypersensitivity or allergy to bevacizumab
- The patient was or might be pregnant.
- The patient was breastfeeding.
- Investigators judged that the patient was inappropriate for enrollment in this study.

### Treatment interruption or discontinuation

Treatment was interrupted or discontinued when the patient exhibited any of the adverse events (AEs) described below:

| Adverse Event                         | Grade          | Remediation                                                                            |
|---------------------------------------|----------------|----------------------------------------------------------------------------------------|
| Hematologic                           | grade $\geq 3$ | Bevacizumab was stopped, and it was restarted if the AE improved to grade $\leq 2$ .   |
| Non-hematologic (except for below AE) |                |                                                                                        |
| Venous thromboembolism                | grade 3        | Bevacizumab was stopped, and it was restarted if the AE improved to grade $\leq 2$ .   |
|                                       | grade 4        | Bevacizumab was discontinued.                                                          |
| Arterial thromboembolism              | grade $\geq 3$ | Bevacizumab was discontinued.                                                          |
| Hypertension                          | grade 3        | Bevacizumab was stopped, and it was re-started when the hypertension was controllable. |
|                                       | grade 4        | Bevacizumab was discontinued.                                                          |
| Proteinuria                           | grades 2, 3    | Bevacizumab was stopped, and it was restarted when proteinuria was                     |



|                                                               |                |                                            |
|---------------------------------------------------------------|----------------|--------------------------------------------|
|                                                               |                | downgraded to grade 1 or $\leq 2$ g/24 hr. |
|                                                               | grade 4        | Bevacizumab was discontinued.              |
| Hemoptysis                                                    | grade $\geq 2$ | Bevacizumab was discontinued.              |
| Intracranial hemorrhage                                       | all grades     | Bevacizumab was discontinued.              |
| Gastrointestinal<br>perforation, wound<br>dehiscence, fistula | all grades     | Bevacizumab was discontinued.              |

Bevacizumab treatment was discontinued when the toxicity had not resolved within 6 wks or the same AE occurred after the re-start of bevacizumab. Bevacizumab should be interrupted or discontinued when investigators judge that the administration of bevacizumab is inappropriate.

**Supplementary Table 1.**

Radiation modality and dose information in all 41 cases in the study

| Case | FAS | PPS | Radiation Modality | Gy/Fraction | Fractions |
|------|-----|-----|--------------------|-------------|-----------|
| 1    | ○   | ×   | hypo-IMRT          | 7.4         | 10        |
| 2    | ×   | ×   | SRS                | 22          | 1         |
| 3    | ○   | ×   | XRT                | 2           | 30        |
| 4    | ○   | ×   | SRS                | 22          | 1         |
|      |     |     | SRS                | 22          | 1         |
|      |     |     | SRT                | 10          | 3         |
|      |     |     | SRS                | 22          | 1         |
|      |     |     | SRS                | 22          | 1         |
| 5    | ○   | ×   | WB-XRT             | 3           | 10        |
|      |     |     | SRS                | 20          | 1         |
|      |     |     | SRS                | 20          | 1         |
|      |     |     | XRT                | 2           | 18        |
|      |     |     | SRT                | 2           | 5         |

|    |   |   |           |      |    |
|----|---|---|-----------|------|----|
| 6  | ○ | × | XRT       | 1.8  | 28 |
|    |   |   | SRS       | 16   | 1  |
|    |   |   | SRS       | 16   | 1  |
| 7  | ○ | ○ | hypo-IMRT | 2.5  | 28 |
|    |   |   | XRT       | 2    | 28 |
| 8  | ○ | × | hypo-IMRT | 4.5  | 10 |
|    |   |   | SRS       | 16   | 1  |
| 9  | ○ | ○ | WB-XRT    | 3    | 10 |
|    |   |   | SRS       | 22.5 | 1  |
| 10 | ○ | × | SRT       | 3.5  | 7  |
| 11 | ○ | × | SRS       | 13.4 | 1  |
|    |   |   | SRS       | 14.6 | 1  |
| 12 | ○ | ○ | SRT       | 5    | 8  |
|    |   |   | SRT       | 6    | 5  |
| 13 | ○ | × | SRT       | 5    | 8  |
| 14 | ○ | ○ | SRT       | 5    | 8  |
| 15 | ○ | × | XRT       | 2    | 30 |

|    |   |   |        |      |    |
|----|---|---|--------|------|----|
| 16 | ○ | ○ | SRT    | 5    | 8  |
| 17 | ○ | ○ | SRT    | 5    | 8  |
| 18 | ○ | × | SRT    | 5    | 8  |
| 19 | ○ | ○ | XRT    | 2    | 30 |
| 20 | ○ | ○ | XRT    | 2    | 27 |
|    |   |   | SRT    | 10   | 3  |
| 21 | ○ | ○ | SRT    | 11.7 | 3  |
| 22 | ○ | × | SRS    | 20   | 1  |
|    |   |   | SRS    | 22   | 1  |
|    |   |   | SRS    | 20   | 1  |
| 23 | ○ | ○ | XRT    | 2    | 30 |
|    |   |   | BNCT   | 10.5 | 1  |
| 24 | ○ | ○ | SRT    | 1.8  | 28 |
|    |   |   | Proton | 1.65 | 28 |
| 25 | ○ | ○ | XRT    | 1.8  | 28 |
|    |   |   | Proton | 1.5  | 28 |
| 26 | ○ | ○ | XRT    | 1.8  | 28 |

|    |   |   |           |      |    |
|----|---|---|-----------|------|----|
|    |   |   | Proton    | 1.65 | 28 |
| 27 | ○ | × | XRT       | 2    | 20 |
|    |   |   | hypo-IMRT | 6    | 8  |
| 28 | ○ | ○ | XRT       | 2.15 | 32 |
| 29 | ○ | ○ | SRT       | 8.5  | 4  |
| 30 | ○ | ○ | SRT       | 8.5  | 4  |
| 31 | ○ | × | XRT       | 2    | 30 |
|    |   |   | XRT       | 2    | 10 |
| 32 | ○ | × | SRS       | 12   | 1  |
|    |   |   | SRS       | 12   | 1  |
| 33 | × | × | SRS       | 23   | 1  |
|    |   |   | SRT       | 7    | 5  |
|    |   |   | SRS       | 22   | 1  |
|    |   |   | SRS       | 22   | 1  |
| 34 | ○ | ○ | XRT       | 2    | 30 |
|    |   |   | XRT       | 2    | 15 |
|    |   |   | SRT       | 9    | 3  |

|    |   |   |     |      |    |
|----|---|---|-----|------|----|
| 35 | ○ | ○ | SRS | 22.5 | 1  |
| 36 | ○ | × | XRT | 2    | 25 |
|    |   |   | XRT | 2    | 25 |
|    |   |   | SRT | 16   | 8  |
|    |   |   | SRS | 16   | 1  |
|    |   |   | SRS | 16   | 1  |
| 37 | × | × | SRT | 15   | 3  |
| 38 | ○ | × | XRT | 2    | 30 |
|    |   |   | SRS | 23   | 1  |
| 39 | ○ | × | XRT | 2    | 30 |
|    |   |   | SRS | 20   | 1  |
|    |   |   | SRS | 20   | 1  |
| 40 | ○ | ○ | XRT | 2    | 30 |
|    |   |   | SRS | 18   | 1  |
| 41 | ○ | ○ | SRT | 10   | 3  |

○ : means included in FAS (Full analysis set) or PPS (Per protocol set)

X : means excluded in FAS or PPS

Hypo-IMRT: hypo-fractionated intensity modulated radiotherapy

SRS: stereotactic radiosurgery, SRT: stereotactic radiotherapy,

XRT: X-ray treatment, WB :whole brain,

**Supplementary Table 2.** Subgroup analysis of patients with remission and patients

without remission in the full analysis set (FAS)

| Variable                                           | Remission<br>(n=30) | Non-Remission<br>(n=8) | p-value |
|----------------------------------------------------|---------------------|------------------------|---------|
| Median age (yrs): median (range)                   | 53.5 (17–72)        | 63 (22–73)             | 0.203   |
| Sex                                                |                     |                        |         |
| Male                                               | 17 (56.7)           | 5 (62.5)               | 1.000   |
| Female                                             | 13 (43.3)           | 3 (37.5)               |         |
| KPS: median (range)                                | 70 (60–100)         | 60 (60–80)             | 0.434   |
| Original tumor pathology: no. (%)                  |                     |                        |         |
| Primary brain tumor                                | 22 (81.5)           | 5 (18.5)               | 0.655*  |
| Metastatic brain tumor                             | 7 (70.0)            | 3 (30.0)               |         |
| Time from RT to diagnosis (mos):<br>median (range) | 24.5 (3.0–140.9)    | 16.0 (5.3–95.9)        | 0.535   |
| Radiotherapy                                       |                     |                        |         |
| SRS                                                | 21                  | 5                      | 0.689*  |
| RT other than SRS:                                 | 9                   | 3                      |         |



|                                     |                  |                  |        |
|-------------------------------------|------------------|------------------|--------|
| High-dose RT                        | 7                | 1                |        |
| (HF IMRT, proton beam, BNCT)        |                  |                  | 0.660* |
| (RT except for high dose RT)        | 23               | 7                |        |
| Chemotherapy for tumor              |                  |                  |        |
| Temozolomide                        | 15 (50.0)        | 5 (62.5)         | 0.697  |
| Other chemotherapeutic agents       | 9 (30.0)         | 1 (12.5)         | 0.653  |
| Treatment for radiation necrosis    |                  |                  |        |
| Corticosteroids                     | 30 (100.0)       | 8 (100.0)        | –      |
| Vitamin E                           | 13 (43.3)        | 5 (62.5)         | 0.438  |
| Anticoagulants/antiplatelets        | 14 (46.7)        | 3 (37.5)         | 0.709  |
| Necrotomy                           | 3 (10.0)         | 1 (12.5)         | 1.000  |
| Hyperbaric oxygen                   | 3 (10.0)         | 0 (0.0)          | 1.000  |
| Bevacizumab                         | 1 (3.3)          | 0 (0.0)          | 1.000  |
| Osmotic diuretics                   | 1 (3.3)          | 0 (0.0)          | 1.000  |
| L/N ratio (median; range)           |                  |                  |        |
| <sup>11</sup> C-methionine          | 1.5 (0.61–1.78)  | 1.56 (0.98–1.80) | 1.000  |
| <sup>18</sup> F-boronophenylalanine | 1.93 (1.64–2.30) | 1.5              | –      |
| Volume of BRN (mL) median (range)   |                  |                  |        |

|                          |                   |                   |       |
|--------------------------|-------------------|-------------------|-------|
|                          | 136.23            | 134.30            |       |
| Perilesional edema       | (1.94–359.06)     | (91.42–222.25)    | 0.816 |
| Contrast-enhanced lesion | 7.29 (1.59–40.25) | 9.03 (1.66–33.64) | 0.816 |

---

BNCT, boron neutron capture therapy; BRN, brain radiation necrosis; HF-IMRT,

hypofractionated intensity-modulated radiotherapy; KPS, Karnofsky Performance Status; L/N,

lesion/ normal tissue; SRS, stereotactic radiosurgery.

The Wilcoxon rank sum test was used for the statistical analysis. \*Fisher's exact test was used.

**Supplementary Table 3.** Serious and frequent adverse events

| Event                             | No. of patients | Percent |
|-----------------------------------|-----------------|---------|
| <b>Grade <math>\geq</math> 3:</b> |                 |         |
| Hypertension                      | 2               | 4.9     |
| Elevated ALT                      | 2               | 4.9     |
| Convulsion                        | 2               | 4.9     |
| Cellulitis                        | 1               | 2.4     |
| Pneumonia                         | 1               | 2.4     |
| Urethritis                        | 1               | 2.4     |
| Anemia                            | 1               | 2.4     |
| Ulcerative colitis                | 1               | 2.4     |
| Duodenal obstruction              | 1               | 2.4     |
| Maculo-papular rash               | 1               | 2.4     |
| Elevated GGT                      | 1               | 2.4     |
| White blood cell count abnormal   | 1               | 2.4     |
| Undernutrition                    | 1               | 2.4     |

**> 5%:**

|                                                   |    |      |
|---------------------------------------------------|----|------|
| Hypertension                                      | 14 | 34.1 |
| Elevated ALT                                      | 13 | 31.7 |
| Anemia                                            | 12 | 29.3 |
| WBC count abnormal                                | 11 | 26.8 |
| Fibrin D dimer abnormal                           | 10 | 24.4 |
| Platelet count abnormal                           | 10 | 24.4 |
| Pyrexia                                           | 8  | 19.5 |
| Elevated AST                                      | 8  | 19.5 |
| Prothrombin time prolonged                        | 7  | 17.1 |
| Convulsion                                        | 5  | 12.2 |
| Headache                                          | 5  | 12.2 |
| Diarrhea                                          | 5  | 12.2 |
| Activated partial thromboplastin time<br>Abnormal | 5  | 12.2 |
| Blood fibrinogen abnormal                         | 5  | 12.2 |
| Fibrin degradation products abnormal              | 5  | 12.2 |
| Proteinuria                                       | 5  | 12.2 |
| Neutrophil count abnormal                         | 5  | 12.2 |

|                    |   |     |
|--------------------|---|-----|
| Epistaxis          | 4 | 9.8 |
| Nausea             | 4 | 9.8 |
| Fatigue            | 4 | 9.8 |
| Decreased appetite | 3 | 7.3 |

---

ALT, Alanine aminotransferase; AST, Aspartate aminotransferase; GGT, gamma-glutamyltransferase.

## **The search strategy used in the systematic review of the literature regarding treatments for BRN**

We conducted a systematic literature review to identify previous research evidence about conventional medical treatments for brain radiation necrosis (BRN).

### *Eligibility Criteria*

Our aim was to identify any studies describing the management for delayed cerebral radiation necrosis with a nonsurgical treatment and to provide a comprehensive review of the evidence related to this topic.

### *Definition*

We defined BRN as late-phase brain radiation injuries with a necrotic lesion detected by radiographical examination or histopathological diagnosis.

### *Literature Search*

The searches were performed by two independent investigators (authors M.F. and N.N.), using combinations of the terms shown in the table below. Studies in English

were retrieved from PubMed and the Cochrane Library, dated from 1 January 1946 to 21 February 2015. The searches included all article types (original articles, reviews, letters, and case series); only single case reports were eliminated. References were also checked for the inclusion of potential papers related to the topic, and duplicate results were deleted.

### *Summarizing the evidence*

We summarized the evidence extracted from the above literature search as described below. Corticosteroids and anticoagulants have been routinely used in the treatment for BRN patients, but we were unable to find any randomized studies of these conventional therapies. Thus, there is limited evidence regarding conservative treatments for BRN.

**Literature search (21, February, 2015)**

| Search | Query                                                                                                                                                                                                                                                                                                                                                                                                                                                                                                                                                                                                                                                                                                                                                                                                                 | items found |
|--------|-----------------------------------------------------------------------------------------------------------------------------------------------------------------------------------------------------------------------------------------------------------------------------------------------------------------------------------------------------------------------------------------------------------------------------------------------------------------------------------------------------------------------------------------------------------------------------------------------------------------------------------------------------------------------------------------------------------------------------------------------------------------------------------------------------------------------|-------------|
| #1     | Search (radiotherapy[ti] OR radiotherapies[ti] OR radiation therapy[ti] OR "radiation injuries" [ti] OR "radiation injury"[ti] OR radio*[ti] OR radiation*[ti] OR irradiation*[ti] OR Cyberknife[ti] OR "Gamma knife" [ti] OR Sterotactic*[ti] OR Radiosurgery[ti] OR Radiotherapy[ti] OR "Sterotactic radiosurgery" [ti] OR "Sterotactic radiotherapy" [ti]) AND (necrosis[ti] OR necroses[ti] OR "necrotic"[ti] OR "radiation necrosis" [ti] OR radiation necroses[ti] OR radionecrosis[ti] OR "cerebral radiation necrosis"[ti] OR "cerebral radionecrosis"[ti] OR "cerebral radio-necrosis"[ti] OR "delayed brain injury"[ti] OR "late brain injury"[ti] OR "delayed cerebral injury"[ti] OR "late cerebral injury"[ti] OR "late injury"[ti] OR "delayed injury"[ti] OR Injury*[ti] OR Damage*[ti] OR Edema*[ti]) | 8830        |
| #2     | Search ("drug therapy"[tw] OR "drug treatment"[tw] OR Pharmacotherapy[tw] OR Pharmacotherapies[tw] OR Medication[tw] OR "Medical treatment"[tw] OR Medicine[tw] OR Radioprotective[tw] OR Melatonin[tw] OR Vitamin[tw] OR Antiplatelet[tw] OR Anticoagulant[tw] OR Steroid[tw] OR Edaravone[tw] OR "Hyperbaric oxygen"[tw] OR Dexamethasone[tw] OR Betamethasone[tw] OR Glucocorticoid*[tw] OR Conservative[tw])                                                                                                                                                                                                                                                                                                                                                                                                      | 2978698     |
| #3     | Search (brain[tw] OR cerebral[tw] OR cerebrum[tw] OR "cerebral white matter"[tw] OR "central nervous system"[tw] OR glioma*[tw] OR arteriovenous malformation* OR arteriovenous fistula* OR meningioma*[tw] OR "Brain metastasis"[tw] OR "Brain metastases"[tw] OR "Metastatic brain tumor"[tw] OR "Metastatic cerebral tumor"[tw])                                                                                                                                                                                                                                                                                                                                                                                                                                                                                   | 1452981     |
| #4     | Search (#1 AND #2 AND #3) AND Humans[mh]                                                                                                                                                                                                                                                                                                                                                                                                                                                                                                                                                                                                                                                                                                                                                                              | 111         |
| #5     | Search (bevacizumab[ti] OR Avastin [ti])                                                                                                                                                                                                                                                                                                                                                                                                                                                                                                                                                                                                                                                                                                                                                                              | 5391        |
| #6     | Search (#4 NOT #5)                                                                                                                                                                                                                                                                                                                                                                                                                                                                                                                                                                                                                                                                                                                                                                                                    | 92          |

**Response rate of steroids for BRN reported in the literature**

| Steroid      | Author            | Number of treated | Clinical and radiographical improvement | Response rate | PMID     | Year | Article title                                                                                                                                        |
|--------------|-------------------|-------------------|-----------------------------------------|---------------|----------|------|------------------------------------------------------------------------------------------------------------------------------------------------------|
|              | Lorenzo ND et al. | 10                | 1                                       | 10%           | 364708   | 1978 | Late cerebral radionecrosis.                                                                                                                         |
|              | Glass JP et al.   | 9                 | 3                                       | 33%           | 6478431  | 1984 | Cerebral radiation necrosis following treatment of extra cranial malignancies.                                                                       |
|              | Woo E et al.      | 7                 | 3                                       | 43%           | 3694200  | 1987 | Cerebral radionecrosis: is surgery necessary?                                                                                                        |
|              | Tang Y et al.     | 65                | 25                                      | 38%           | 25142813 | 2014 | Effect of edaravone on radiation-induced brain necrosis in patients with nasopharyngeal carcinoma after radiotherapy: a randomized controlled trial. |
| <b>Total</b> |                   | 91                | 32                                      | <b>35.2%</b>  |          |      |                                                                                                                                                      |



**Response rate of anticoagulants for BRN reported in the literature**

| Anticoagulants | Author            | Number of treated | Clinical and radiographical improvement | Response rate | PMID     | Year | Article title                                                                   |
|----------------|-------------------|-------------------|-----------------------------------------|---------------|----------|------|---------------------------------------------------------------------------------|
|                | Rizzoli HV et al. | 2                 | 2                                       | 100%          | 6699703  | 1984 | Treatment of delayed radiation necrosis of the brain. A clinical observation.   |
|                | Glantz MJ et al.  | 8                 | 5                                       | 63%           | 7969953  | 1994 | Treatment of radiation-induced nervous system injury with heparin and warfarin. |
|                | Happold C et al.  | 8                 | 3                                       | 38%           | 18716713 | 2008 | Anticoagulation for radiation-induced neurotoxicity revisited.                  |
| <b>Total</b>   |                   | 18                | 10                                      | <b>55.6%</b>  |          |      |                                                                                 |
